# Supplementary material
Source: PubMed Central journal article supplement (PMC2996902)

control

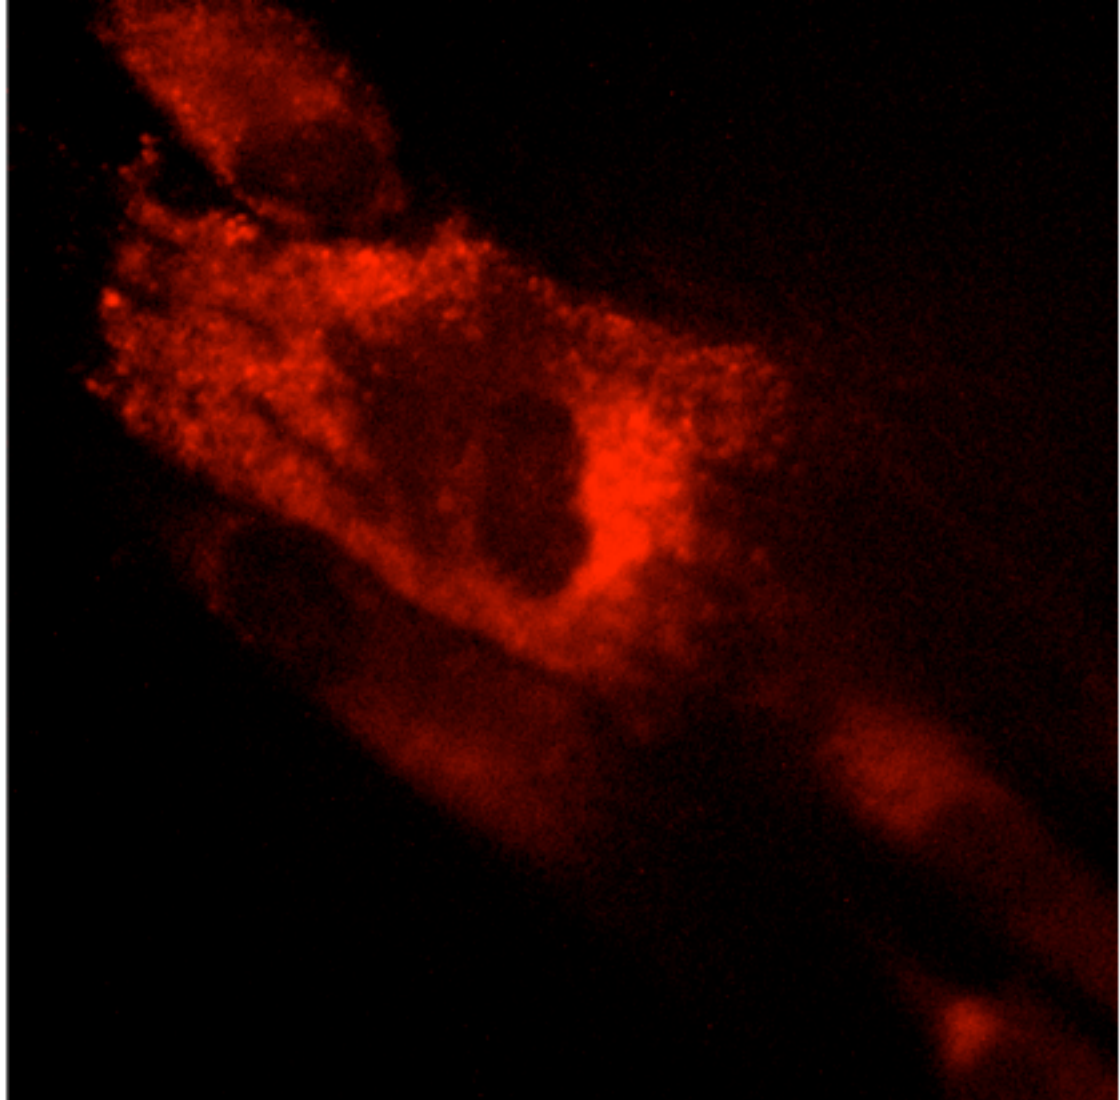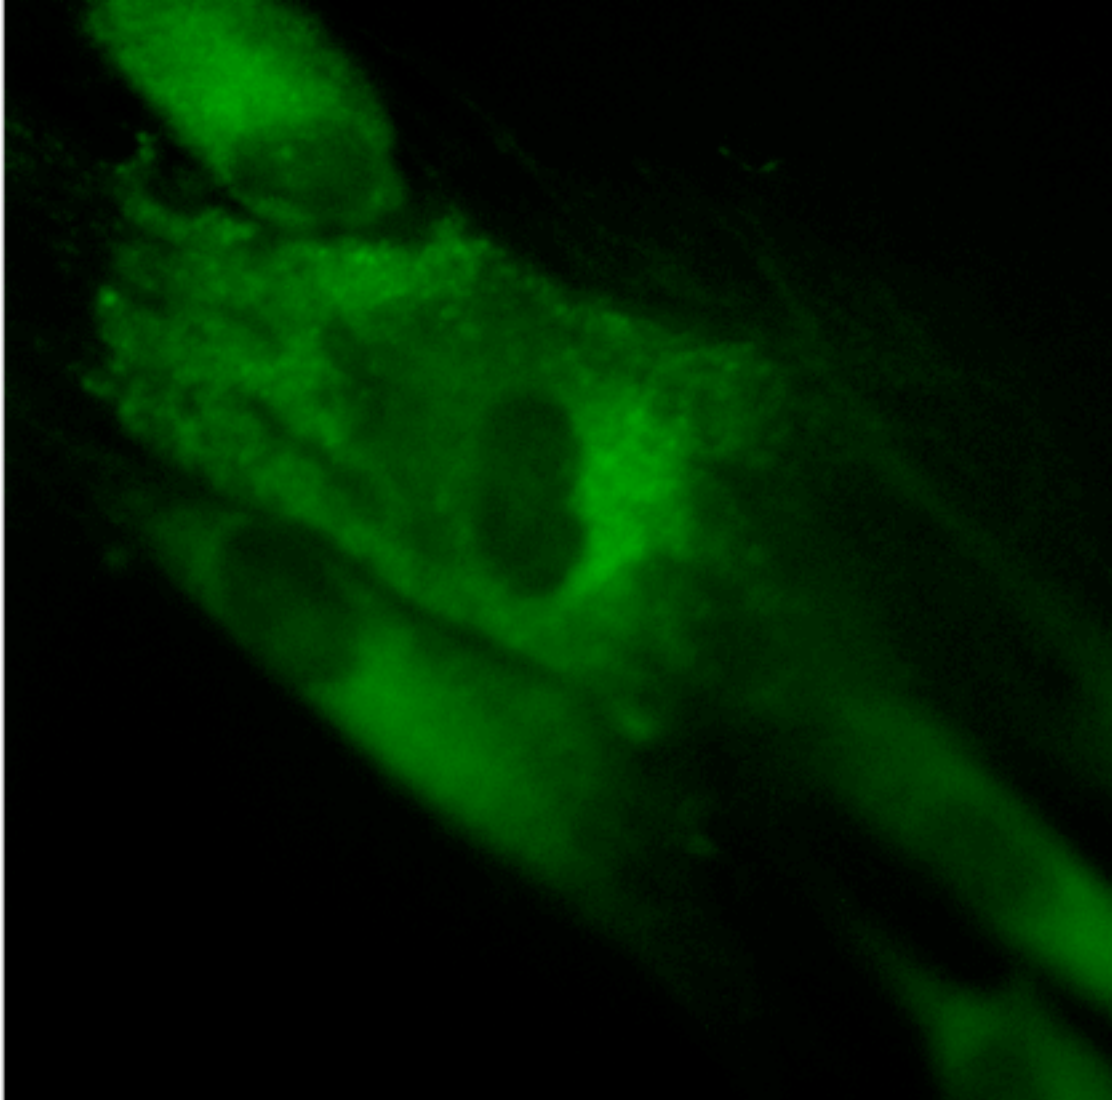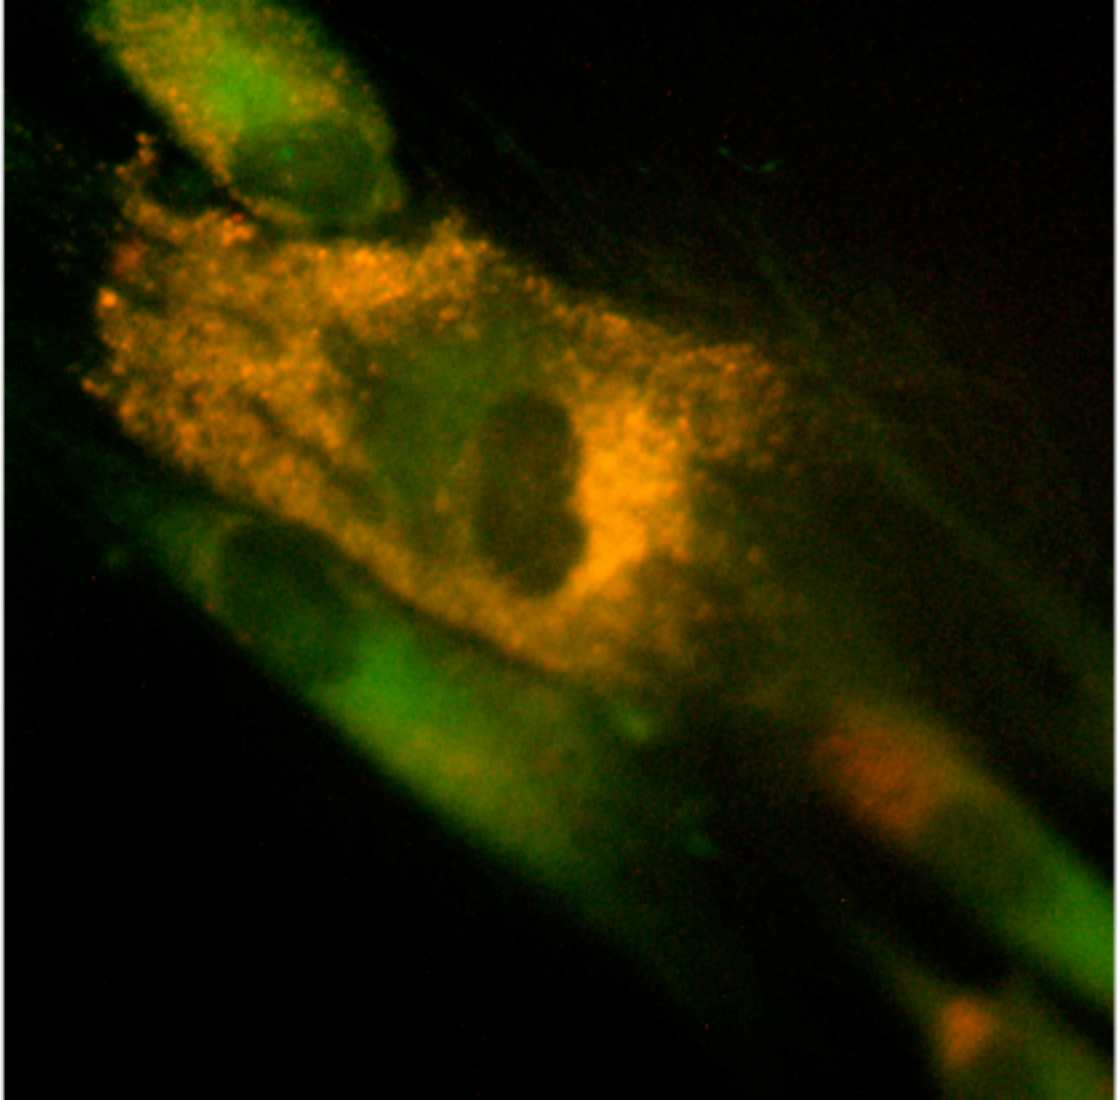

P2

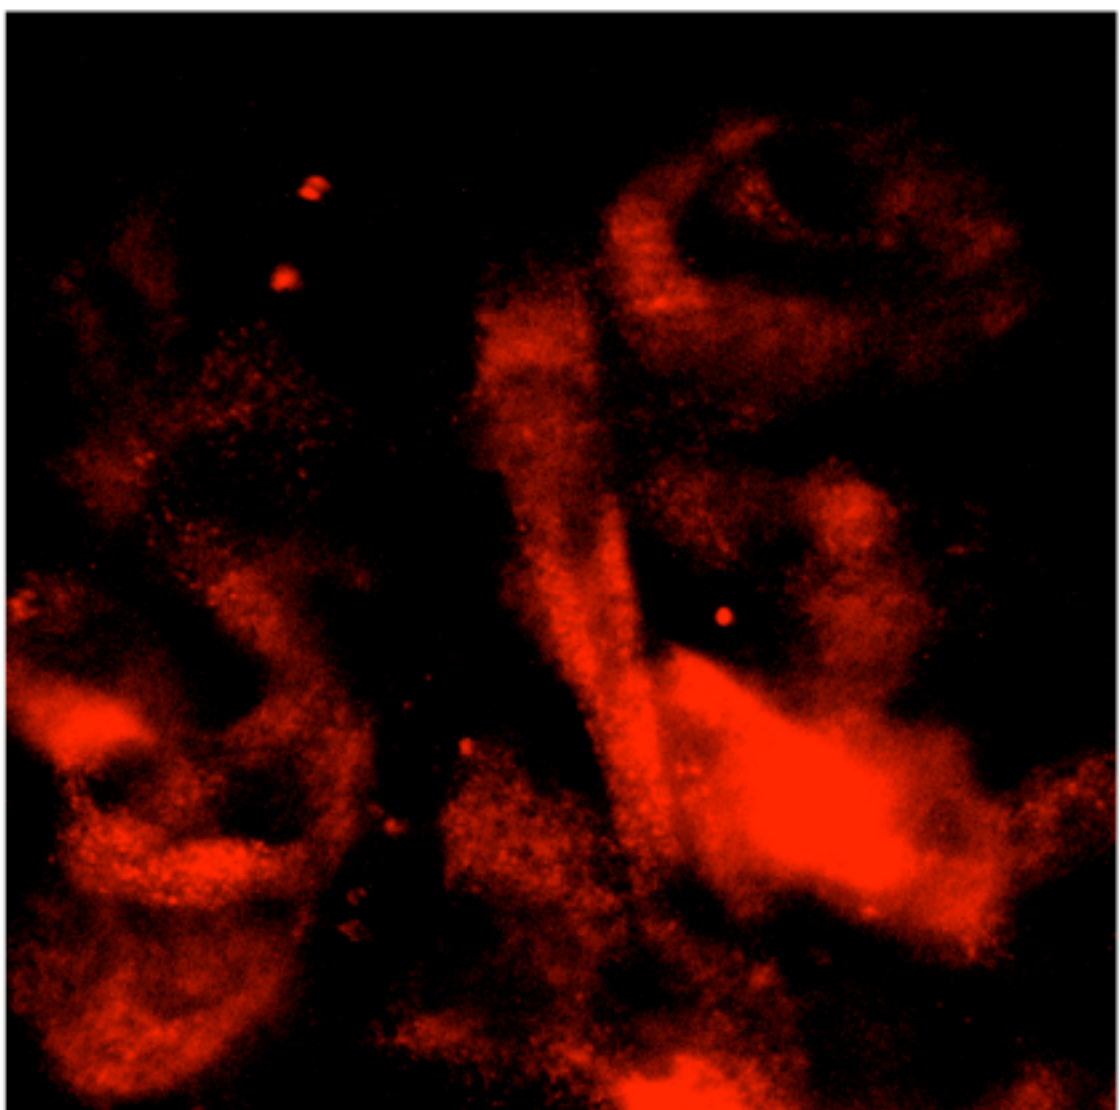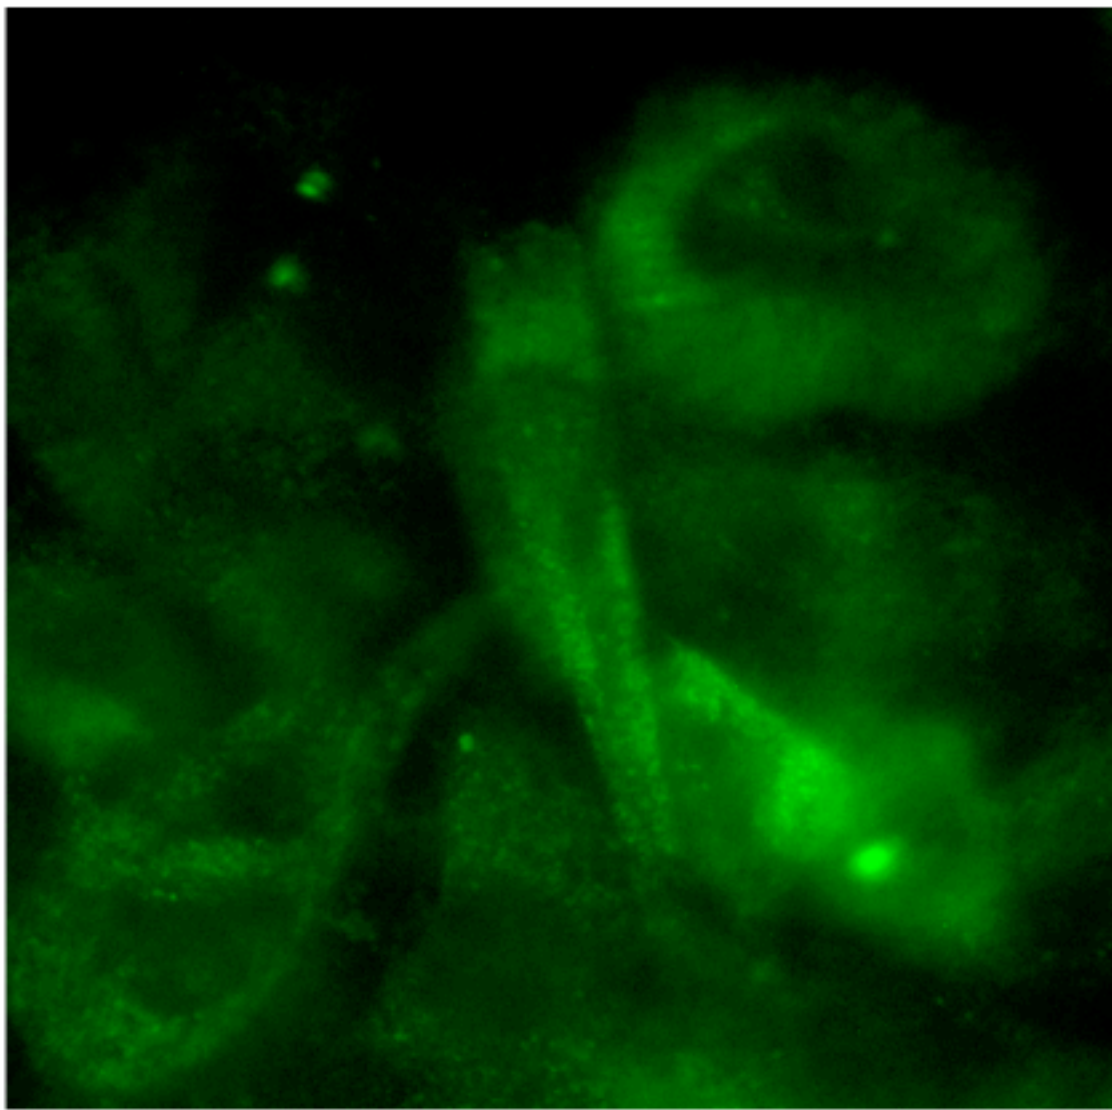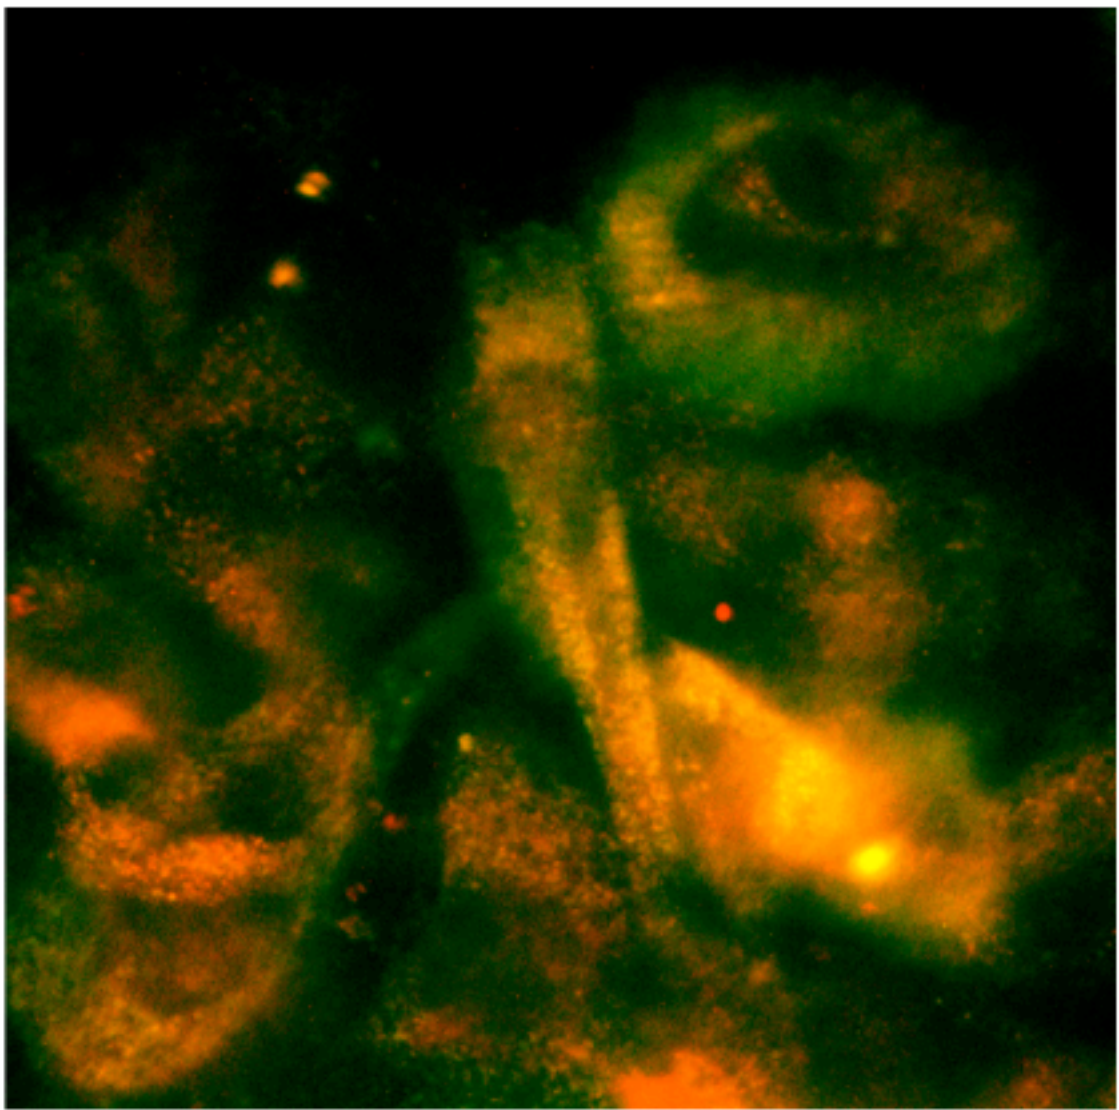

Supplement: supp_fj.09-152728_09-152728SuppFig1.pdf [file supp_fj.09-152728_09-152728SuppFig1.pdf]
